# Supplementary material for: Virus-host protein-protein interactions of mycobacteriophage Giles
Source: PubMed Central journal article supplement (PMC5705681; doi:10.1038/s41598-017-16303-7), 2017-11-28
Supplement: 41598_2017_16303_MOESM1_ESM.pdf [file 41598_2017_16303_MOESM1_ESM.pdf]

# **Virus-host protein-protein interactions of mycobacteriophage Giles**

**Jitender Mehla**<sup>\*1</sup>, Rebekah M. Dedrick<sup>2</sup>, J. Harry Caufield<sup>1</sup>, Jeroen Wagemans<sup>3</sup>, Neha Sakhawalkar<sup>1</sup>, Allison Johnson<sup>1</sup>, Graham F. Hatfull<sup>2</sup>, Peter Uetz<sup>1\*</sup>

**1** Center for the Study of Biological Complexity, Virginia Commonwealth University,  
Richmond, VA 23284, USA

**2** Department of Biological Sciences, University of Pittsburgh, Pittsburgh, Pennsylvania  
15260, USA

**3** Laboratory of Gene Technology, KU Leuven, Kasteelpark Arenberg 21 – Box 2462,  
3001 Leuven, Belgium

## Supplementary Figures and Tables

**Figures S1- S4** The phenotypic alterations of natural and heterologous hosts upon overexpression of Giles proteins. Giles Gp17 in *E. coli* (**Fig S1 A**) and *M. smegmatis* (**Fig S1 B**; **arrow indicates formation of small cells**); Gp47 in *E. coli* (**Fig S2 A**) and *M. smegmatis* (**Fig S2 B**); Gp54 in *M. smegmatis* (**Fig S3**) and Gp64 in *E. coli* (**Fig S4 top**) and *M. smegmatis* (**Fig S4 bottom**).

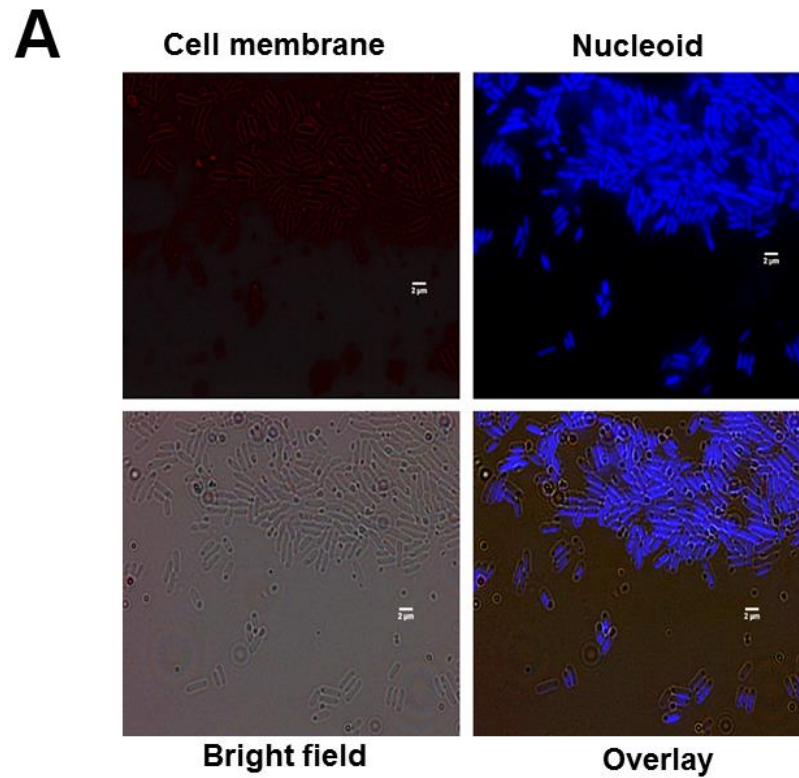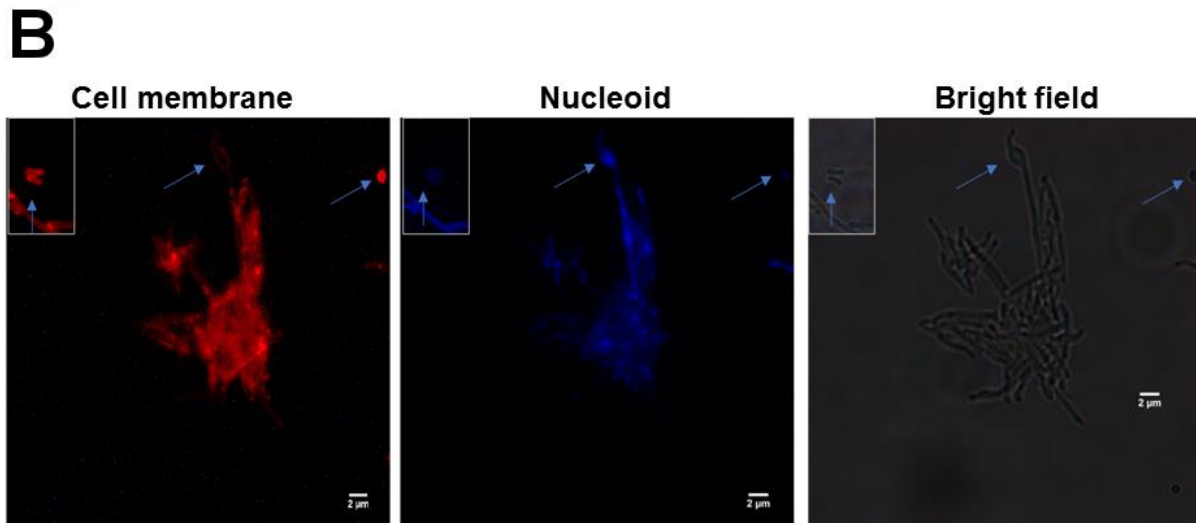

**Supplementary Figure S1.** The phenotypic alterations of natural and heterologous hosts upon overexpression of Giles proteins. Giles Gp17 in *E. coli* (**Fig S1 A**) and *M. smegmatis* (**Fig S1 B**; arrow indicates formation of small cells).

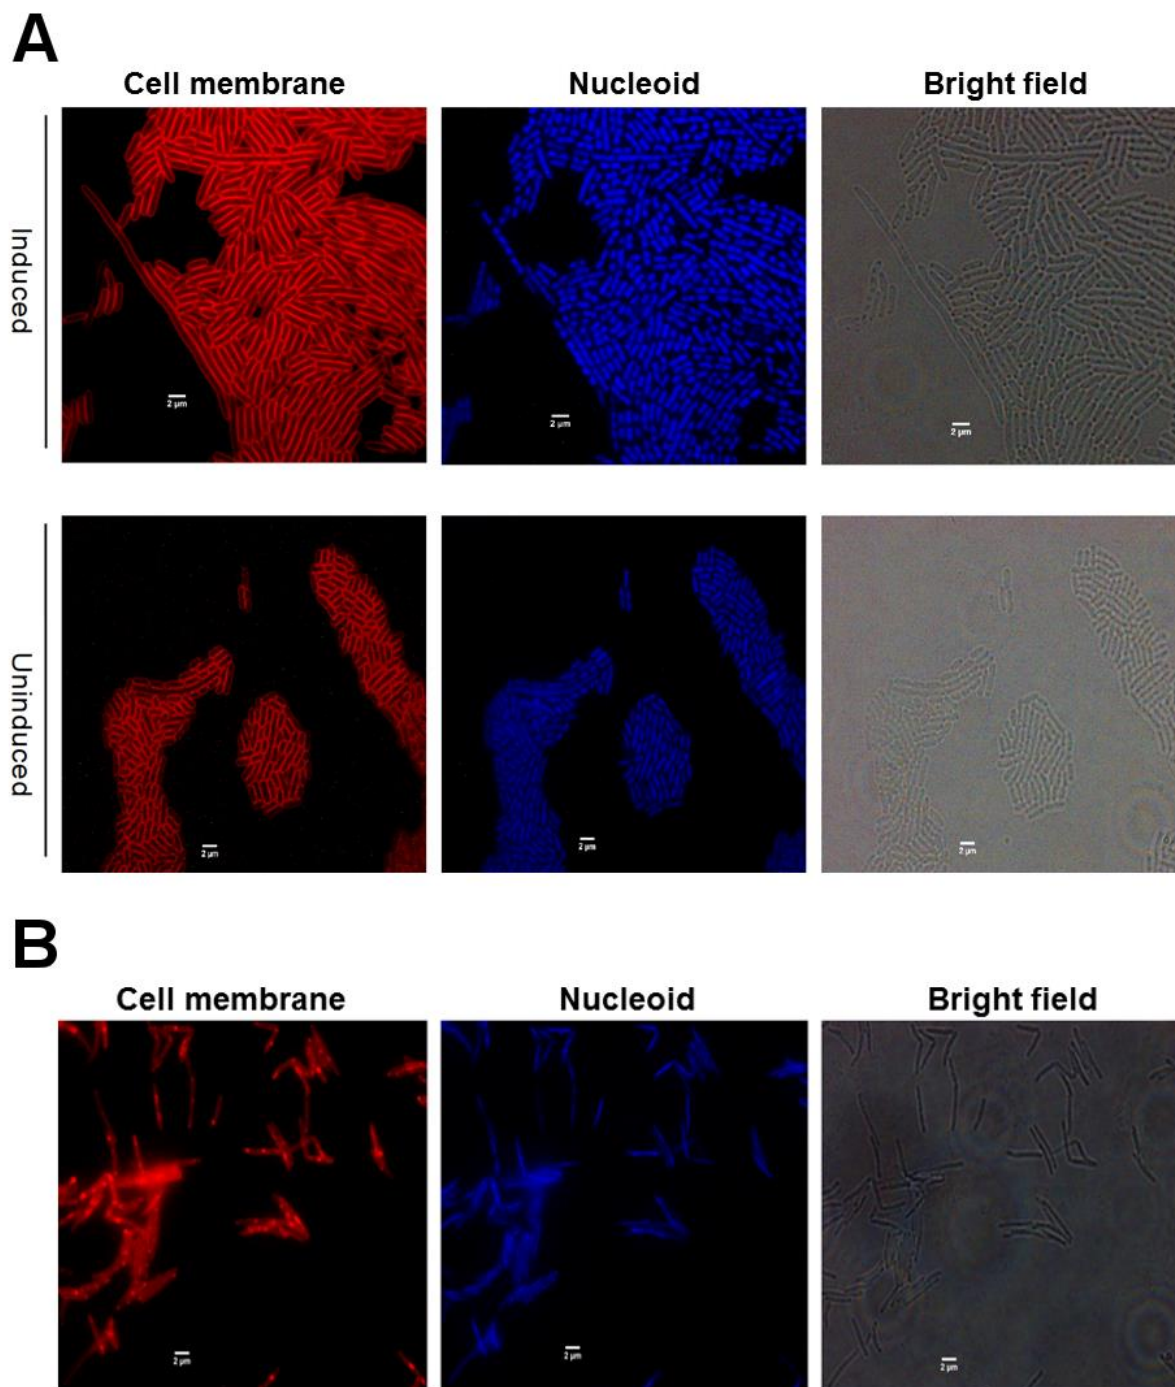

**Supplementary Figure S2.** The phenotypic alterations of natural and heterologous hosts upon overexpression of Giles proteins. Giles Gp47 in *E. coli* (Fig S2 A) and *M. smegmatis* (Fig S2 B).

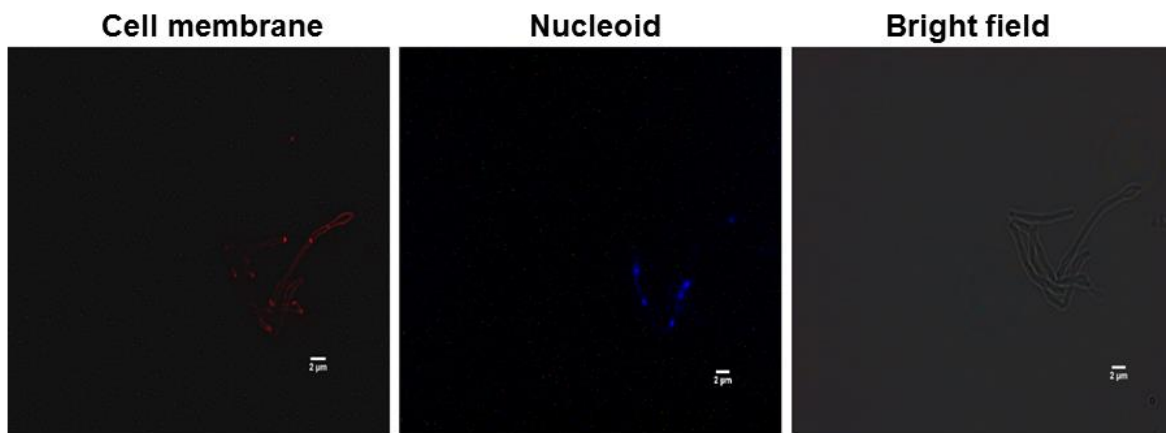

**Supplementary Figure S3.** The phenotypic alterations of *M. smegmatis* upon overexpression of Giles protein Gp54.

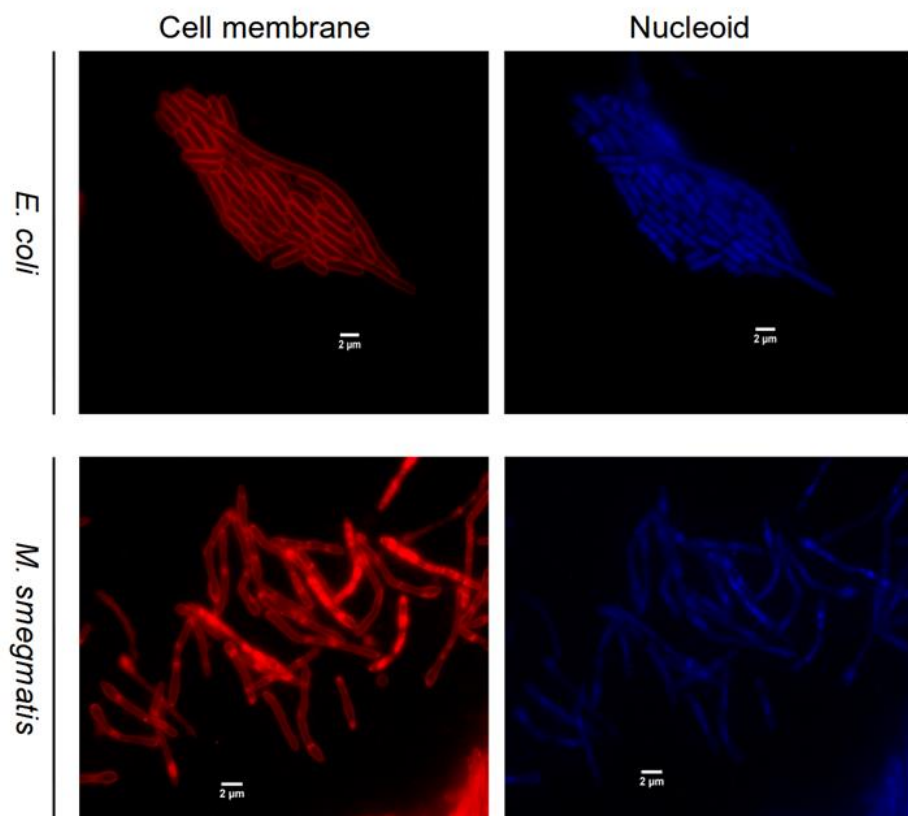

**Supplementary Figure S4.** The phenotypic alterations of natural and heterologous hosts upon overexpression of Giles proteins. Giles Gp64 in *E. coli* (**top**) and *M. smegmatis* (**bottom**).

**Table S1.** The sequences of the host interactors for Giles proteins with other details, are shown here. Separate Excel spreadsheet.

**Table S2.** List of oligonucleotides used in this study.

| <b>Oligo Name</b> | <b>Sequence</b>                                      |
|-------------------|------------------------------------------------------|
| MSMEG_3746A       | GCACGGATCGGGAACCGTCC                                 |
| MSMEG_3746B       | TGGTGAGGGAGATGAGGTCTGAAGAAGCATCCTCCGTGACGAAGGG       |
| MSMEG_3746C       | GTTGAGGTGTGAGGTGTGCTGAAGGCTGGAGAAATCCGACGTCCGTG      |
| MSMEG_3746D       | TGGCGGTATTGGTACACCAGTACCAC                           |
| MSMEG_4430A       | CCAGCGATACAAAAGGTTTGAGGAAGATG                        |
| MSMEG_4430B       | TGGTGAGGGAGATGAGGTCTGAAGGTCCGAACTCCACGAATTGAATGAATCC |
| MSMEG_4430C       | GTTGAGGTGTGAGGTGTGCTGAAGGGTCGTGAACTCGGCTTGCTC        |
| MSMEG_4430D       | GGAGGATGTCCGATCGGTTGC                                |
| MSMEG_5773A       | GTCGGCGAGGAACTGGGATGG                                |
| MSMEG_5773B       | TGGTGAGGGAGATGAGGTCTGAAGGGCTTCTCCTGGTAGCTTCGGC       |
| MSMEG_5773C       | GTTGAGGTGTGAGGTGTGCTGAAGTCAAATCATTCTCCGGTGACAGGAG    |
| MSMEG_5773D       | CGACGCCTACACCGTCACACC                                |
